# Supplementary material for: Element screening of metal sites in Fe-based Prussian blue framework materials for ammonium ion battery applications: a first-principles study
Source: Royal Society of Chemistry journal article supplement (doi:10.1039/d3cp04278b), 2023-12-12
Supplement: d3cp04278b1.pdf [file d3cp04278b1.pdf]

**Comparative Analysis of  $M_a$  Site Elements in Fe-Based  
Prussian Blue Frame Materials for Ammonium Ion Battery  
Applications: A First-Principles Study**

Yu Zhang, Junjie Xing, Bo Zhang, Likai Tong, Xiuli Fu\*

School of Integrated Circuits, and State Key Laboratory of Information Photonics and Optical

Communications, Beijing University of Posts and Telecommunications, Beijing 100876, P.R. China

\* **Corresponding author.** [xiulifu@bupt.edu.cn](mailto:xiulifu@bupt.edu.cn) (X. Fu)

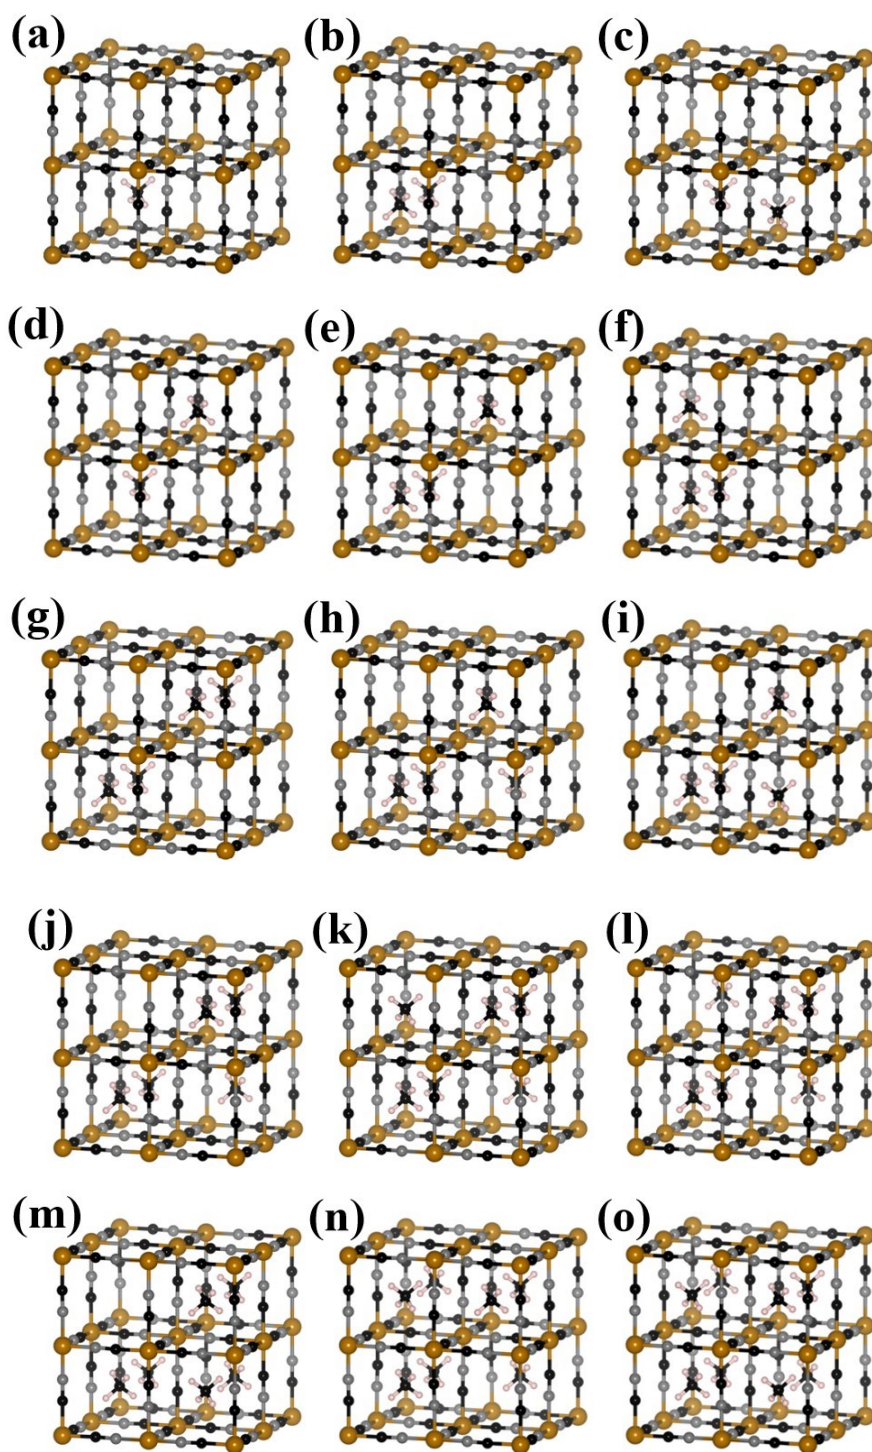

**Fig. S1** The considered configurations of  $\text{NH}_4^+$  embedding in  $\text{Fe}[\text{Fe}(\text{CN})_6]$ . (a) 1  $\text{NH}_4^+$ , (b-d) 2  $\text{NH}_4^+$ , (e-f) 3  $\text{NH}_4^+$ , (g-i) 4  $\text{NH}_4^+$ , (j) 5  $\text{NH}_4^+$ , (k-m) 6  $\text{NH}_4^+$ , (n) 7  $\text{NH}_4^+$ , (o) 8  $\text{NH}_4^+$ .

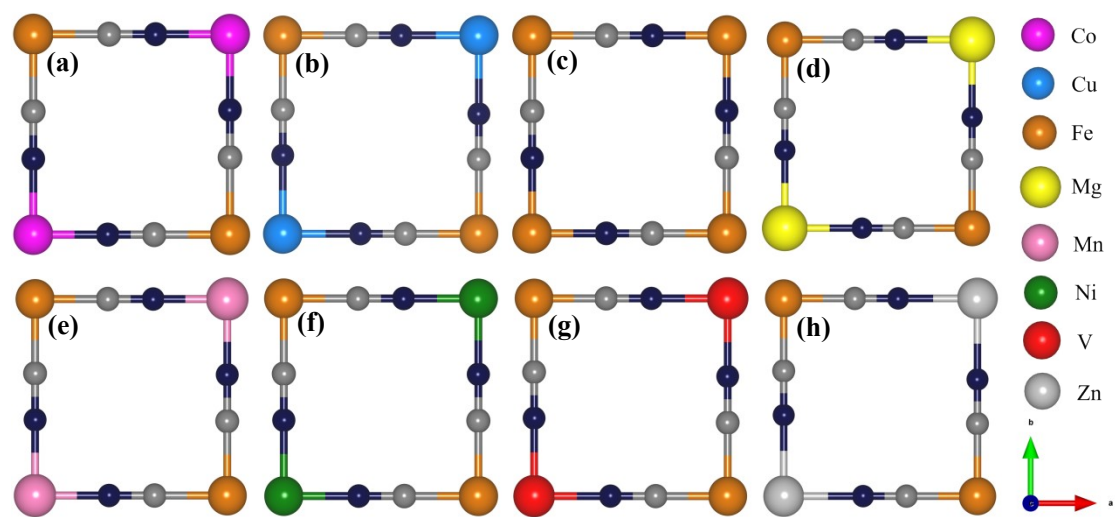

**Fig. S2** Front view of  $M_a[\text{Fe}(\text{CN})_6]$  ( $M_a\text{Fe}$  PBAs) local models with different  $M_a$  elements. And  $M_a$  = (a) Co, (b) Cu, (c) Fe, (d) Mg, (e) Mn, (f) Ni, (g) V, (h) Zn.

**Tab. S1** Average atomic distances of  $M_a$ Fe PBAs for different  $M_a$  elements ( $M_a$  = Co, Cu, Fe, Mg, Mn, Ni, V, Zn).

| $M_a$ | $M_a$ -Fe (Å) | $M_a$ -N (Å) | N-C (Å) | C-Fe (Å) |
|-------|---------------|--------------|---------|----------|
| Cu    | 5.09          | 2.02         | 1.17    | 1.91     |
| Co    | 4.94          | 1.87         | 1.17    | 1.90     |
| Fe    | 4.95          | 1.89         | 1.17    | 1.89     |
| Mg    | 5.24          | 2.16         | 1.17    | 1.91     |
| Mn    | 4.97          | 1.91         | 1.17    | 1.88     |
| Ni    | 4.98          | 1.92         | 1.17    | 1.89     |
| V     | 5.04          | 1.99         | 1.18    | 1.87     |
| Zn    | 5.22          | 2.14         | 1.17    | 1.91     |

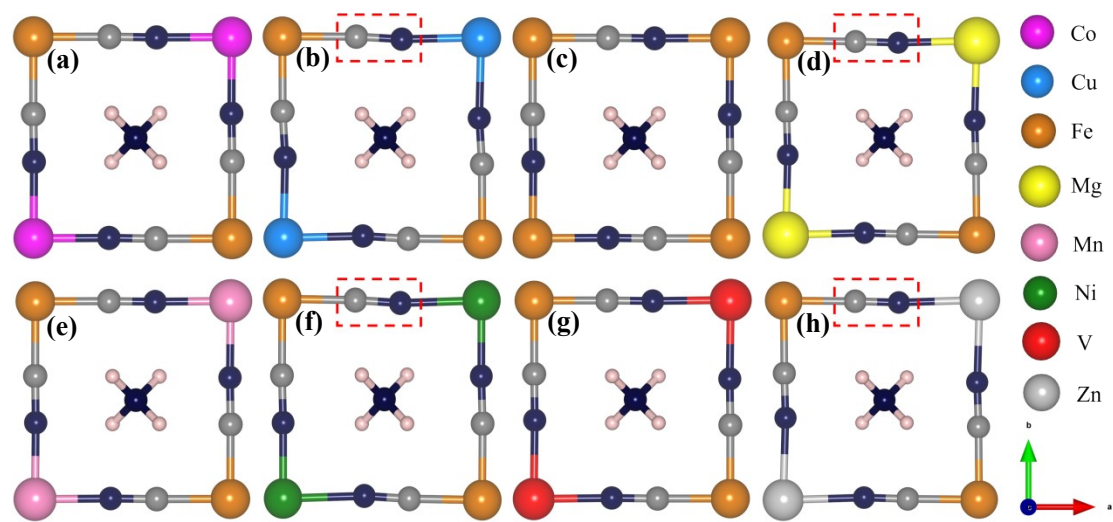

**Fig. S3** Front view of  $M_a[Fe(CN)_6]$  ( $M_a$ Fe PBAs) local models with different  $M_a$  elements after inserting an  $NH_4^+$  ion. And  $M_a =$  (a) Co, (b) Cu, (c) Fe, (d) Mg, (e) Mn, (f) Ni, (g) V, (h) Zn.

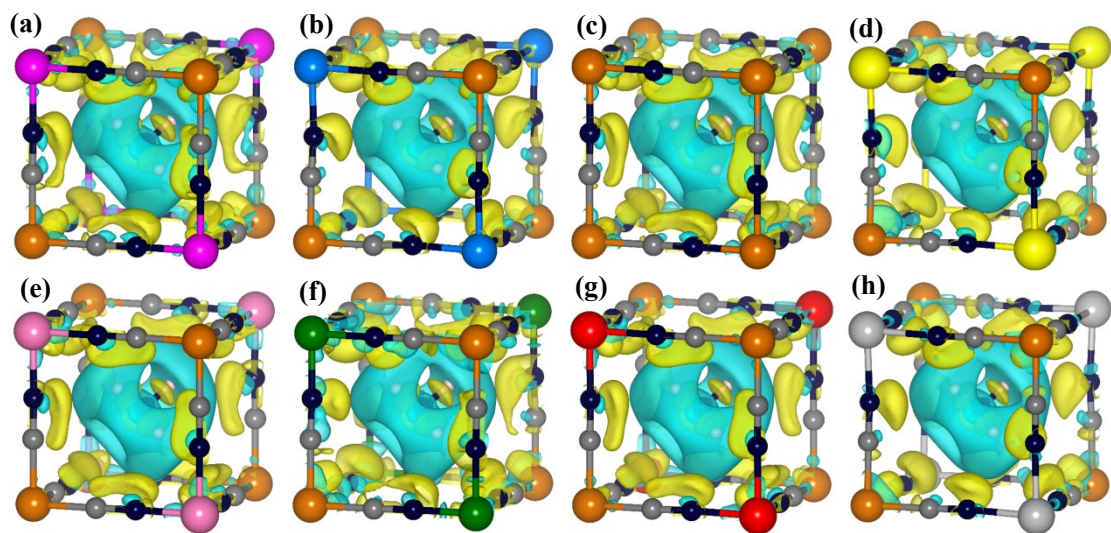

**Fig. S4** Charge Density Difference (CDD) of different  $\text{NH}_4 \cdot \text{M}_a\text{Fe}$  PBAs local models.  $\text{M}_a =$  (a) Co, (b) Cu, (c) Fe, (d) Mg, (e) Mn, (f) Ni, (g) V, (h) Zn.

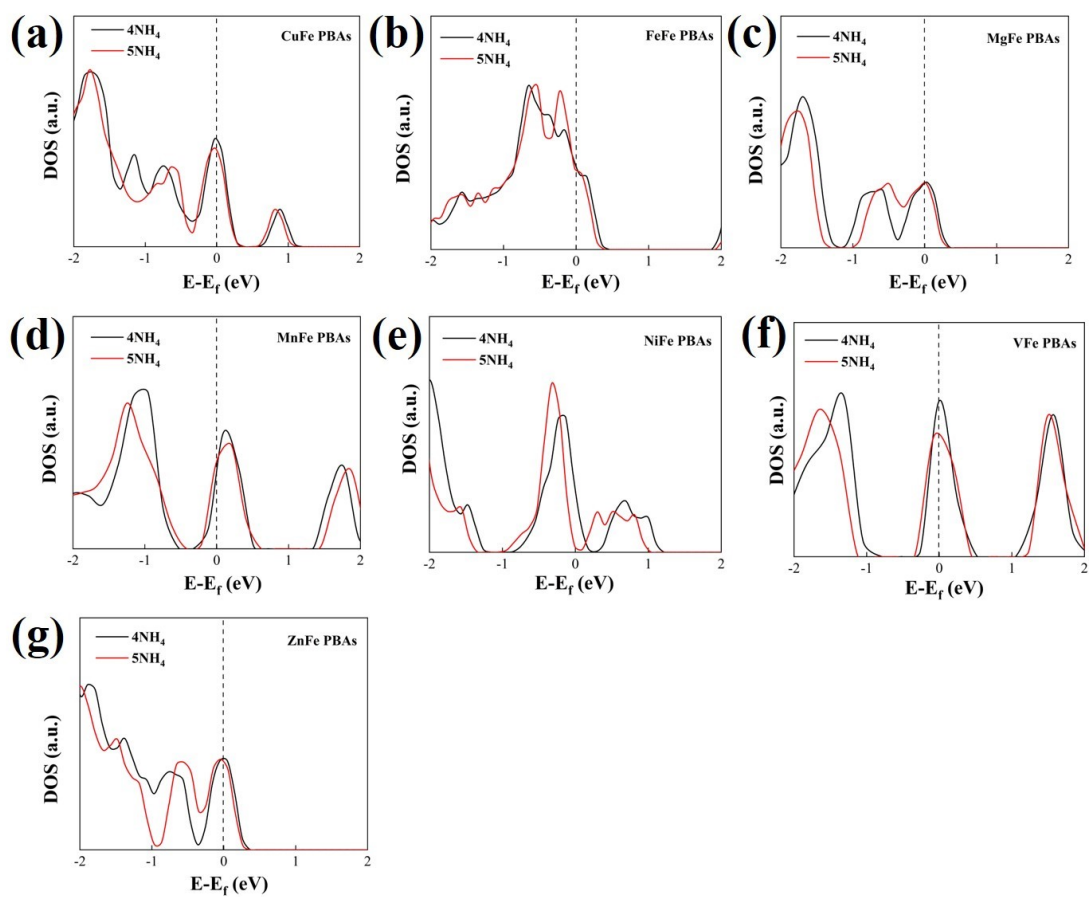

**Fig. S5** The electron state density of  $M_a\text{Fe}$  PBAs model with 4 and 5  $\text{NH}_4^+$  inserted.  $M_a = \text{Cu}, \text{Fe}, \text{Mg}, \text{Mn}, \text{Ni}, \text{V}, \text{Zn}$ .

**Tab. S2** Nominal battery voltage for  $M_a\text{Fe}$  PBAs models with different amounts of  $\text{NH}_4^+$  inserted.  
 $M_a = \text{Co, Cu, Fe, Mg, Mn, Ni, V, Zn}$ .

| <b>Voltage<br/>(V)</b> | <b>1<br/><math>\text{NH}_4^+</math></b> | <b>2<br/><math>\text{NH}_4^+</math></b> | <b>3<br/><math>\text{NH}_4^+</math></b> | <b>4<br/><math>\text{NH}_4^+</math></b> | <b>5<br/><math>\text{NH}_4^+</math></b> | <b>6<br/><math>\text{NH}_4^+</math></b> | <b>7<br/><math>\text{NH}_4^+</math></b> | <b>8<br/><math>\text{NH}_4^+</math></b> | <b>Potential range<br/>(V)</b> |
|------------------------|-----------------------------------------|-----------------------------------------|-----------------------------------------|-----------------------------------------|-----------------------------------------|-----------------------------------------|-----------------------------------------|-----------------------------------------|--------------------------------|
| Co                     | 4.19                                    | 4.24                                    | 4.00                                    | 3.99                                    | 2.57                                    | 2.66                                    | 2.63                                    | 2.94                                    | 1.67                           |
| Cu                     | 4.62                                    | 5.14                                    | 4.90                                    | 4.88                                    | 4.40                                    | 4.35                                    | 4.27                                    | 4.20                                    | 0.94                           |
| Fe                     | 4.05                                    | 4.09                                    | 3.83                                    | 3.81                                    | 3.52                                    | 3.48                                    | 3.19                                    | 3.07                                    | 1.02                           |
| Mg                     | 5.07                                    | 4.89                                    | 4.62                                    | 4.54                                    | 4.29                                    | 4.22                                    | 4.00                                    | 3.90                                    | 1.17                           |
| Mn                     | 3.64                                    | 3.52                                    | 3.22                                    | 3.14                                    | 2.88                                    | 2.82                                    | 2.45                                    | 2.44                                    | 1.20                           |
| Ni                     | 4.70                                    | 4.53                                    | 4.16                                    | 4.21                                    | 4.04                                    | 4.05                                    | 4.16                                    | 4.06                                    | 0.66                           |
| V                      | 3.69                                    | 3.61                                    | 3.34                                    | 3.26                                    | 2.93                                    | 2.81                                    | 2.45                                    | 2.28                                    | 1.41                           |
| Zn                     | 5.07                                    | 4.86                                    | 4.63                                    | 4.52                                    | 4.31                                    | 4.19                                    | 4.03                                    | 3.87                                    | 1.19                           |



**Tab. S3** Voltage ranges and specific capacities @ current densities of reported PBAs used as electrode materials for aqueous ammonium ion batteries.

| <b>Electrode</b>                                            | <b>Potential range (V)</b> | <b>Specific capacity (mAh·g<sup>-1</sup>) @ current density (mA·g<sup>-1</sup>)</b> | <b>Ref.</b> |
|-------------------------------------------------------------|----------------------------|-------------------------------------------------------------------------------------|-------------|
| CuHCF                                                       | 1.24                       | 55@500                                                                              | [1]         |
| NiHCF                                                       | 0.6                        | 38@500                                                                              | [2]         |
| N-CuHCF                                                     | 0.5                        | 53.1@1000                                                                           | [3]         |
| MnHCF                                                       | 1.0                        | 104@100                                                                             | [4]         |
| K <sub>0.9</sub> Cu <sub>1.3</sub> Fe(CN) <sub>6</sub>      | 1.0                        | 60@50                                                                               | [5]         |
| NaFe[Fe(CN) <sub>6</sub> ]                                  | 0.6                        | 60@250                                                                              | [6]         |
| Na <sub>1.45</sub> Fe[Fe(CN) <sub>6</sub> ] <sub>0.93</sub> | 1.0                        | 75@250                                                                              | [7]         |
| (NH <sub>4</sub> ) <sub>2</sub> Cu[Fe(CN) <sub>6</sub> ]    | 0.8                        | 77.8@150                                                                            | [2]         |
| K-V-Fe PBAs                                                 | 1.2                        | 93.4@2000                                                                           | [8]         |
| Na <sub>0.73</sub> Ni[Fe(CN) <sub>6</sub> ] <sub>0.88</sub> | 0.6                        | 92.5@100                                                                            | [9]         |
| Ni <sub>2</sub> Fe(CN) <sub>6</sub>                         | 0.4                        | 57.4@556                                                                            | [10]        |

## References

- 1 C. D. Wessells, M. T. Mcdowell, S. V. Peddada, M. Pasta, R. A. Huggins and Y. Cui, *ACS Nano*, 2012, 6, 1688-1694.
- 2 X. Wu, Y. Qi, J. J. Hong, Z. Li, A. S. Hernandez and X. Ji, *Angew. Chem., Int. Ed.*, 2017, 56, 13026-13030.
- 3 X. Zhang, M. Xia, T. Liu, N. Peng, H. Yu, R. Zheng, L. Zhang, M. Shui and J. Shu, *Chem. Eng. J.*, 2021, 421, 127767.
- 4 H. Zhang, Y. Tian, W. Wang, Z. Jian and W. Chen, *Angew. Chem., Int. Ed.*, 2022, 61, e202204351.
- 5 C. D. Wessells, S. V. Peddada, M. T. Mcdowell, R. A. Huggins and Y. Cui, *J. Electrochem. Soc.*, 2012, 159, A98-A103.
- 6 C. Li, W. Yan, S. Liang, P. Wang, J. Wang, L. Fu, Y. Zhu, Y. Chen, Y. Wu and W. Huang, *Nanoscale Horiz.*, 2019, 4, 991-998.
- 7 C. Li, D. Zhang, F. Ma, T. Ma, J. Wang, Y. Chen, Y. Zhu, L. Fu, Y. Wu and W. Huang, *ChemSusChem*, 2019, 12, 3732-3736.
- 8 J. J. Xing, X. L. Fu, S. D. Guan, Y. Zhang, M. Lei and Z. J. Peng, *Appl. Surf. Sci.*, 2021, 543, 148843.
- 9 W. X. Hou, C. Yan, P. Shao, K. Dai and J. Yang, *Nanoscale*, 2022, 14, 8501.
- 10 H. X. Yu, J. X. Xu, C. C. Deng, M. T. Xia, X. K. Zhang, J. Shu and Z. B. Wang,

ACS Appl. Energy Mater. 2021, 4, 9594–9599.
